# Supplementary material for: Preparation of Graphene Oxide-Maghemite-Chitosan Composites for the Adsorption of Europium Ions from Aqueous Solutions
Source: MDPI journal article supplement (doi:10.3390/molecules27228035), 2022-11-19
Supplement: s1 [file s1]

## Supplementary information

# Preparation of Graphene Oxide-Maghemite-Chitosan Composites for the Adsorption of Europium Ions from Aqueous Solutions

Galina Lujanienė <sup>1,\*</sup>, Raman Novikau <sup>1</sup>, Edith Flora Joel <sup>1</sup>, Karolina Karalevičiūtė <sup>1</sup>, Sergej Šemčuk <sup>1</sup>, Kęstutis Mažeika <sup>1</sup>, Martynas Talaikis <sup>1</sup>, Vidas Pakštas <sup>1</sup>, Saulius Tumėnas <sup>1</sup>, Jonas Mažeika <sup>2</sup> and Kęstutis Jokšas <sup>2</sup>

<sup>1</sup> SRI Center for Physical Sciences and Technology, Savanorių Str. 231, LT-02300 Vilnius, Lithuania

<sup>2</sup> SRI Nature Research Centre, Akademijos Str. 2, LT-08412 Vilnius, Lithuania

\* Correspondence: galina.lujaniene@ftmc.lt

## Contents

|                                                                                                                                              |   |
|----------------------------------------------------------------------------------------------------------------------------------------------|---|
| <b>Figure S1.</b> Adsorption capacities and efficiencies of the composites as a function of initial concentration, pH, and contact time..... | 2 |
| <b>Figure S2.</b> ANFIS architecture.....                                                                                                    | 3 |
| <b>Figure S3.</b> Input-output surfaces of the ANFIS model for the GO-MGH and GO-CS composites .....                                         | 4 |
| <b>Figure S4.</b> Input-output surfaces of the ANFIS model for the GO-MGH-CS I and GO-MGH-CS II composites .....                             | 5 |
| <b>Figure S5.</b> Input-output surfaces of the ANFIS model for the GO-MGH-CS III composite .....                                             | 6 |

**Figure S1.**

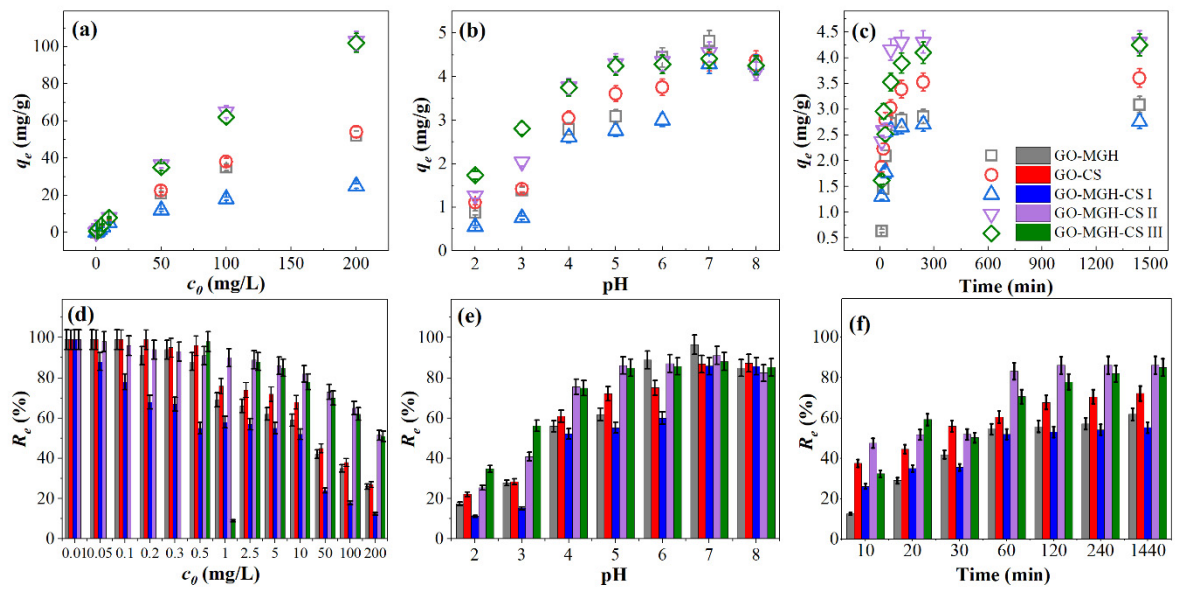

**Figure S1.** Adsorption capacities and efficiencies of the composites as a function of initial concentration (a, d), pH (b, e), and contact time (c, f).

Figure S2.

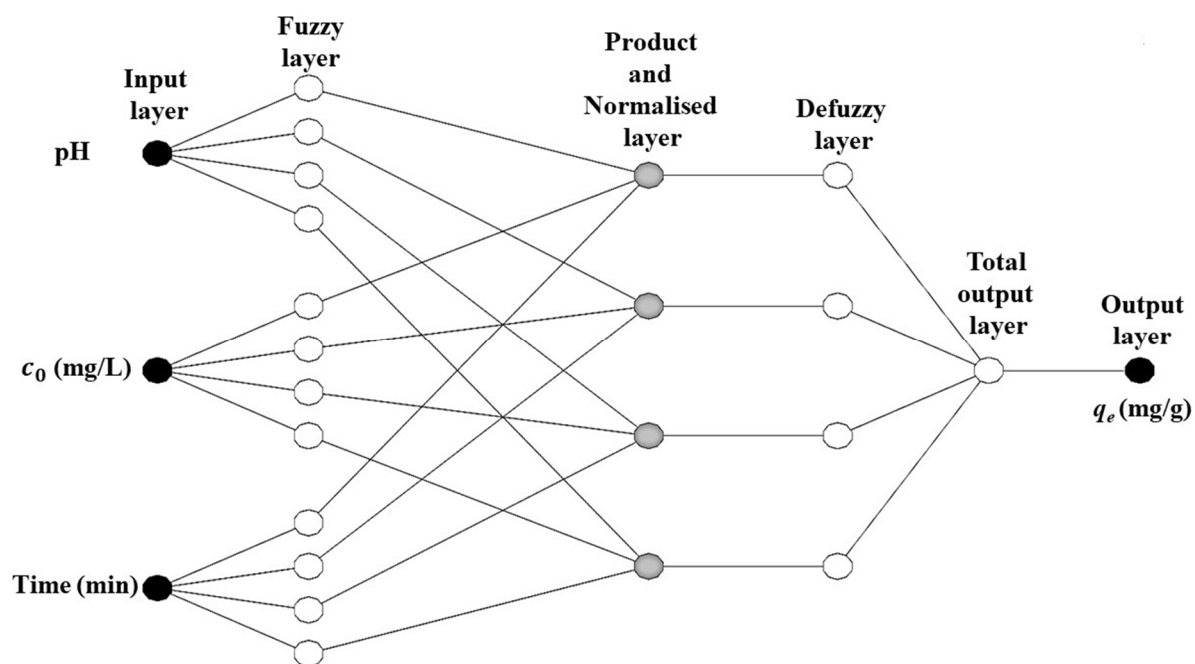

Figure S2. ANFIS architecture.

Figure S3.

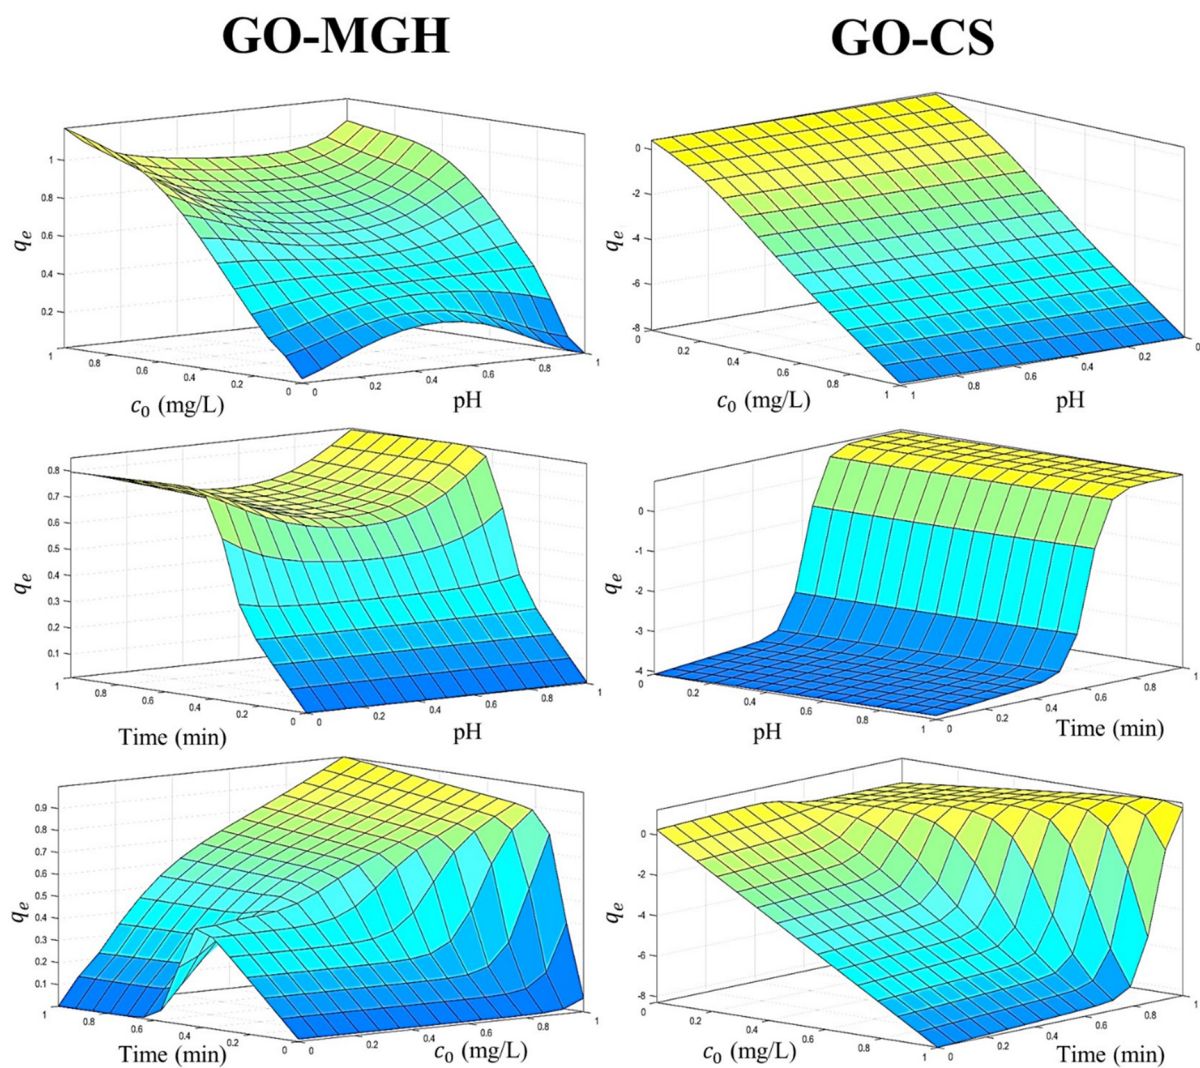

Figure S3. Input-output surfaces of the ANFIS model for the GO-MGH and GO-CS composites.

Figure S4.

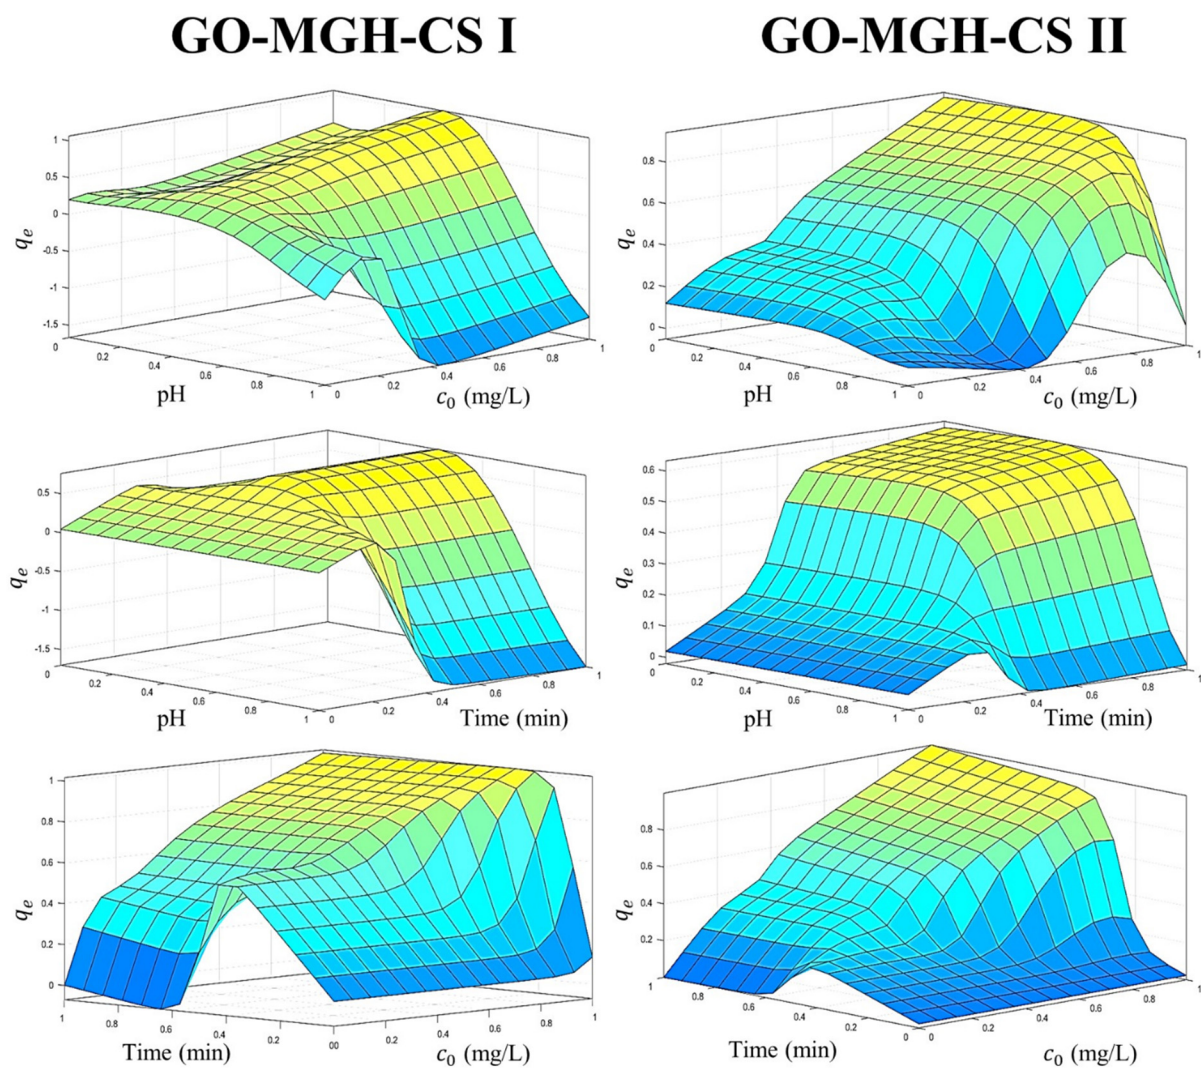

**Figure S4.** Input-output surfaces of the ANFIS model for the GO-MGH-CS I and GO-MGH-CS II composites.

Figure S5.

## GO-MGH-CS III

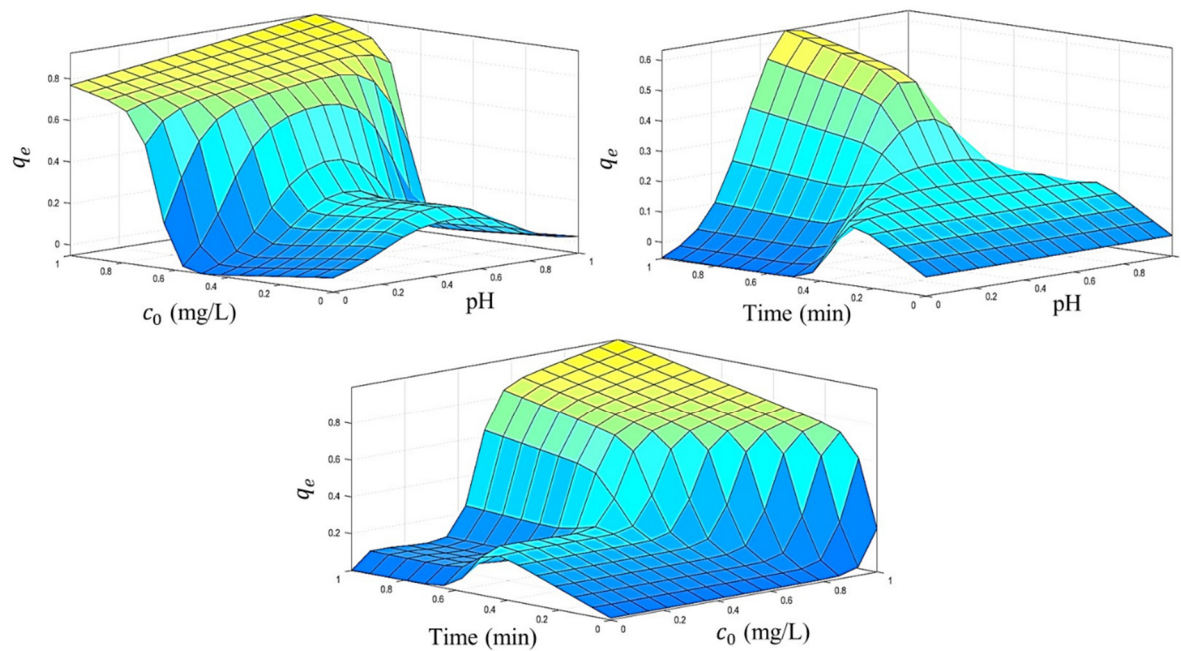

Figure S5. Input-output surfaces of the ANFIS model for the GO-MGH-CS III composite.
